# Supplementary material for: Retarded O2 transport in Co2+-coordinated supramolecular polymer networks for membrane CO2/O2 separations
Source: Royal Society of Chemistry journal article supplement (doi:10.1039/d4ta02376e), 2024-01-01
Supplement: d4ta02376e1.pdf [file d4ta02376e1.pdf]

## Supporting Information

### **Retarded O<sub>2</sub> transport in Co<sup>2+</sup>-coordinated supramolecular polymer networks for membrane CO<sub>2</sub>/O<sub>2</sub> separations**

Taliehsadat Alebrahim, Narjes Esmaeili, Gengyi Zhang, and Haiqing Lin

Department of Chemical and Biological Engineering, University at Buffalo, The State University  
of New York, Buffalo, NY 14260, USA

\* Corresponding author: Email: [haiqingl@buffalo.edu](mailto:haiqingl@buffalo.edu)

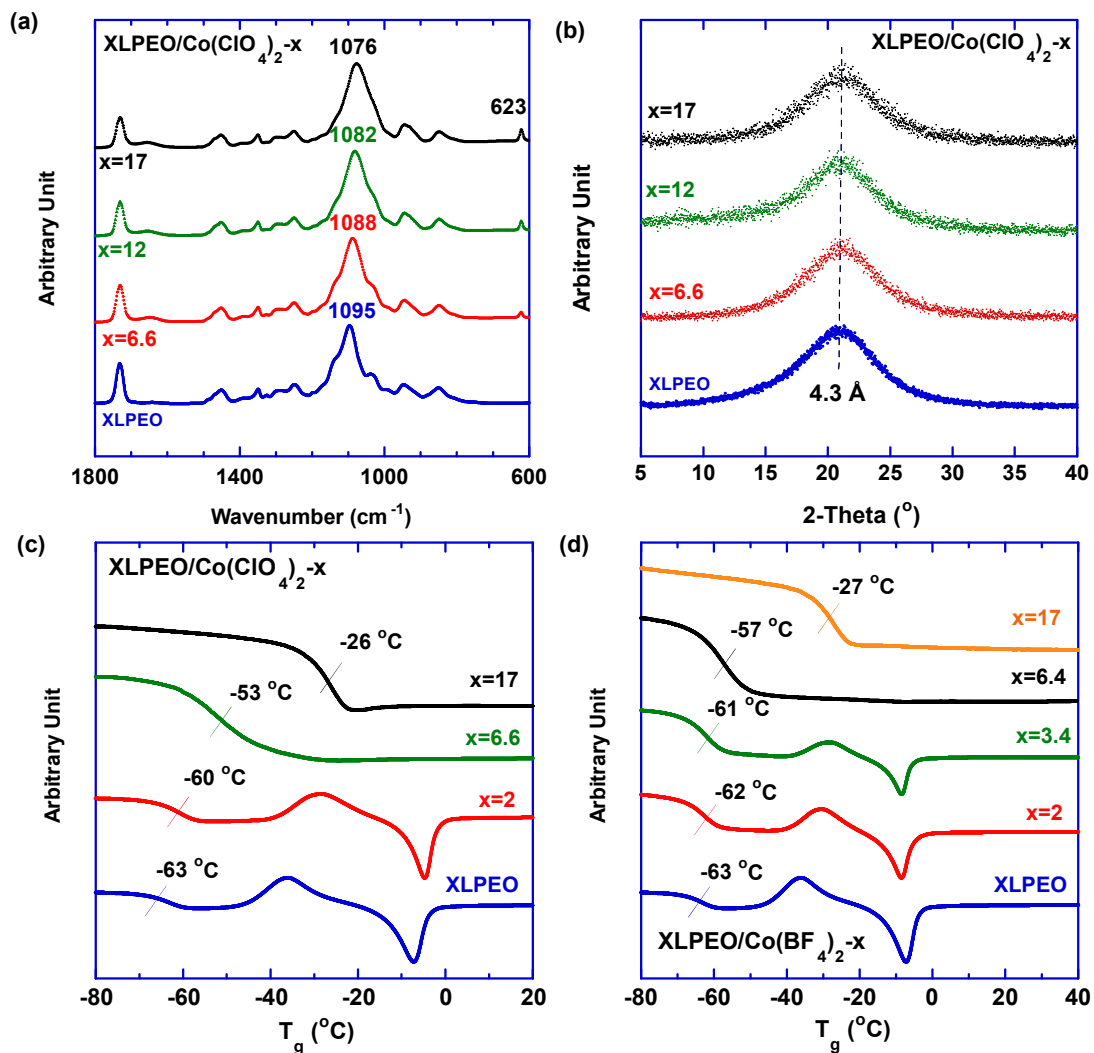

**Fig. S1.** (a) FTIR spectra, (b) XRD patterns, and (c) DSC thermograms of XLPEO/Co(ClO<sub>4</sub>)<sub>2</sub> SPNs. (d) DSC thermograms of XLPEO/Co(BF<sub>4</sub>)<sub>2</sub> SPNs.

**Table S1.** Physical properties, including  $r$  (molar ratio of ether oxygens to cations),  $\rho_{PE}$ ,  $T_g$ , and pure-gas permeability and selectivity at 35 °C in XLPEO/Co(ClO<sub>4</sub>)<sub>2-x</sub>.

| $x$<br>(mass%) | $r$ | $\rho_{PE}$<br>(g/cm <sup>3</sup> ) | $T_g$<br>(°C) | $P_A$ (Barrer) |                |                 | Selectivity                     |                                 |                                |
|----------------|-----|-------------------------------------|---------------|----------------|----------------|-----------------|---------------------------------|---------------------------------|--------------------------------|
|                |     |                                     |               | N <sub>2</sub> | O <sub>2</sub> | CO <sub>2</sub> | CO <sub>2</sub> /N <sub>2</sub> | CO <sub>2</sub> /O <sub>2</sub> | O <sub>2</sub> /N <sub>2</sub> |
| 0              | 0   | 1.149                               | -63           | 10             | 26             | 510             | 51                              | 20                              | 2.6                            |
| 2              | 273 | 1.167                               | -60           | 8.1            | 11             | 140             | 17                              | 13                              | 1.4                            |
| 6.6            | 83  | 1.207                               | -53           | 1.9            | 2.3            | 29              | 15                              | 13                              | 1.2                            |
| 17             | 34  | 1.304                               | -26           | 0.38           | 0.43           | 18              | 46                              | 37                              | 1.1                            |

**Table S2.** Comparison of  $a$  values for various polymer/salt networks.

| Salts<br>in SPNs                  | $a$<br>(10 <sup>-4</sup> m <sup>3</sup> kmol <sup>-1</sup> K <sup>-1</sup> ) | Ref.      |
|-----------------------------------|------------------------------------------------------------------------------|-----------|
| Co salts                          | 8.1                                                                          | This work |
| LiClO <sub>4</sub>                | 2.6                                                                          | 1         |
| Ni(BF <sub>4</sub> ) <sub>2</sub> | 9.3                                                                          | 1         |
| Cu(BF <sub>4</sub> ) <sub>2</sub> | 3.2                                                                          | 1         |

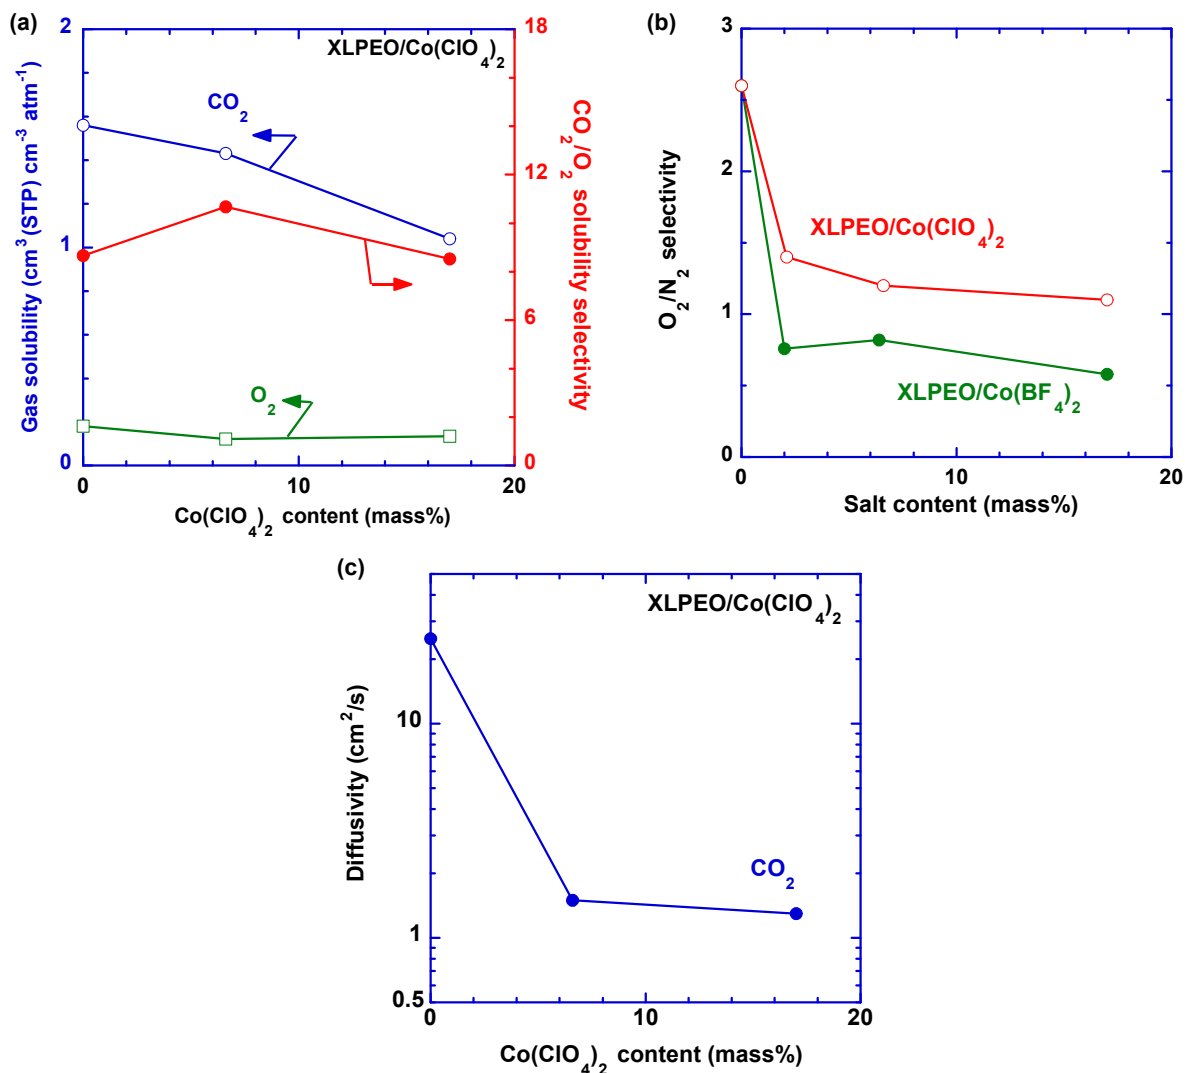

**Fig. S2.** (a) Effect of the Co(ClO<sub>4</sub>)<sub>2</sub> and Co(BF<sub>4</sub>)<sub>2</sub> content in XLPEO on O<sub>2</sub>/N<sub>2</sub> selectivity at 35 °C and 50 psig. (b) CO<sub>2</sub> and O<sub>2</sub> solubility and CO<sub>2</sub>/O<sub>2</sub> solubility selectivity and (c) CO<sub>2</sub> diffusivity as a function of Co(ClO<sub>4</sub>)<sub>2</sub> loading. Gas solubility ( $S_A$ , cm<sup>3</sup> (STP) cm<sup>-3</sup> atm<sup>-1</sup>) at any equilibrium pressure ( $p_A$ , atm) is calculated by  $S_A = C_A/p_A$ , where  $C_A$  is the gas concentration in the polymer (cm<sup>3</sup> (STP) cm<sup>-3</sup>).

**Table S3.** Pure-gas solubility and diffusivity in XLPEO/Co salts at 35 °C.

| SPNs                                          | $S_A$           |                | $S_{CO_2}/S_{O_2}$ | $D_A$ ( $10^{-7}$ cm <sup>2</sup> /s) |                | $D_{CO_2}/D_{O_2}$ |
|-----------------------------------------------|-----------------|----------------|--------------------|---------------------------------------|----------------|--------------------|
|                                               | CO <sub>2</sub> | O <sub>2</sub> |                    | CO <sub>2</sub>                       | O <sub>2</sub> |                    |
| XLPEO                                         | 1.5             | 0.19           | 8.2                | 26                                    | 11             | 2.5                |
| XLPEO/Co(BF <sub>4</sub> ) <sub>2</sub> -6.4  | 1.3             | 6.7            | 0.20               | 0.83                                  | 0.0048         | 173                |
| XLPEO/Co(BF <sub>4</sub> ) <sub>2</sub> -17   | 0.93            | 10             | 0.090              | 0.69                                  | 0.0011         | 650                |
| XLPEO/Co(ClO <sub>4</sub> ) <sub>2</sub> -6.6 | 1.4             | 0.12           | 11                 | 1.5                                   | 1.5            | 1.0                |
| XLPEO/Co(ClO <sub>4</sub> ) <sub>2</sub> -17  | 1.0             | 0.14           | 8.5                | 1.3                                   | 0.23           | 5.7                |

$S_A$ : cm<sup>3</sup>(STP) cm<sup>-3</sup> atm<sup>-1</sup>.

**Table S4.** Pure-gas permeability in XLPEO/Co(BF<sub>4</sub>)<sub>2</sub>-5 at 35 °C during a continuous test. The film had a thickness of ~300 μm, and it was kept under vacuum for ~4 months before the test. The films were tested with CO<sub>2</sub> at 50 psig and O<sub>2</sub> at 100 psig alternatively. The films were exposed to a vacuum for at least 8 h during the gas change.

|                                             | CO <sub>2</sub> | O <sub>2</sub> | CO <sub>2</sub> |       | O <sub>2</sub> |
|---------------------------------------------|-----------------|----------------|-----------------|-------|----------------|
|                                             | Day 1           | Day 2          | Day 3           | Day 6 | Day 8          |
| CO <sub>2</sub> permeability (Barrer)       | 75              |                | 15              | 12    |                |
| O <sub>2</sub> permeability (Barrer)        |                 | 0.74           |                 |       | 0.25           |
| CO <sub>2</sub> /O <sub>2</sub> selectivity |                 | 100            |                 |       | 48             |

**Reference**

1. T. Alebrahim, A. Chakraborty, L. Hu, S. Patil, S. Cheng, D. Acharya, C. M. Doherty, A. J. Hill, T. R. Cook and H. Lin, *J. Membr. Sci.*, 2022, **644**, 120063.
